# Supplementary material for: Statistical characteristics of raindrop size distribution during rainyseasons in Beijing urban area and implications for radar rainfallestimation
Source: Copernicus journal article supplement (doi:10.5194/hess-2019-210), 2019-05-28
Supplement: Supplementary file 1 [file hess-2019-210-supplement.pdf]

## Supplement

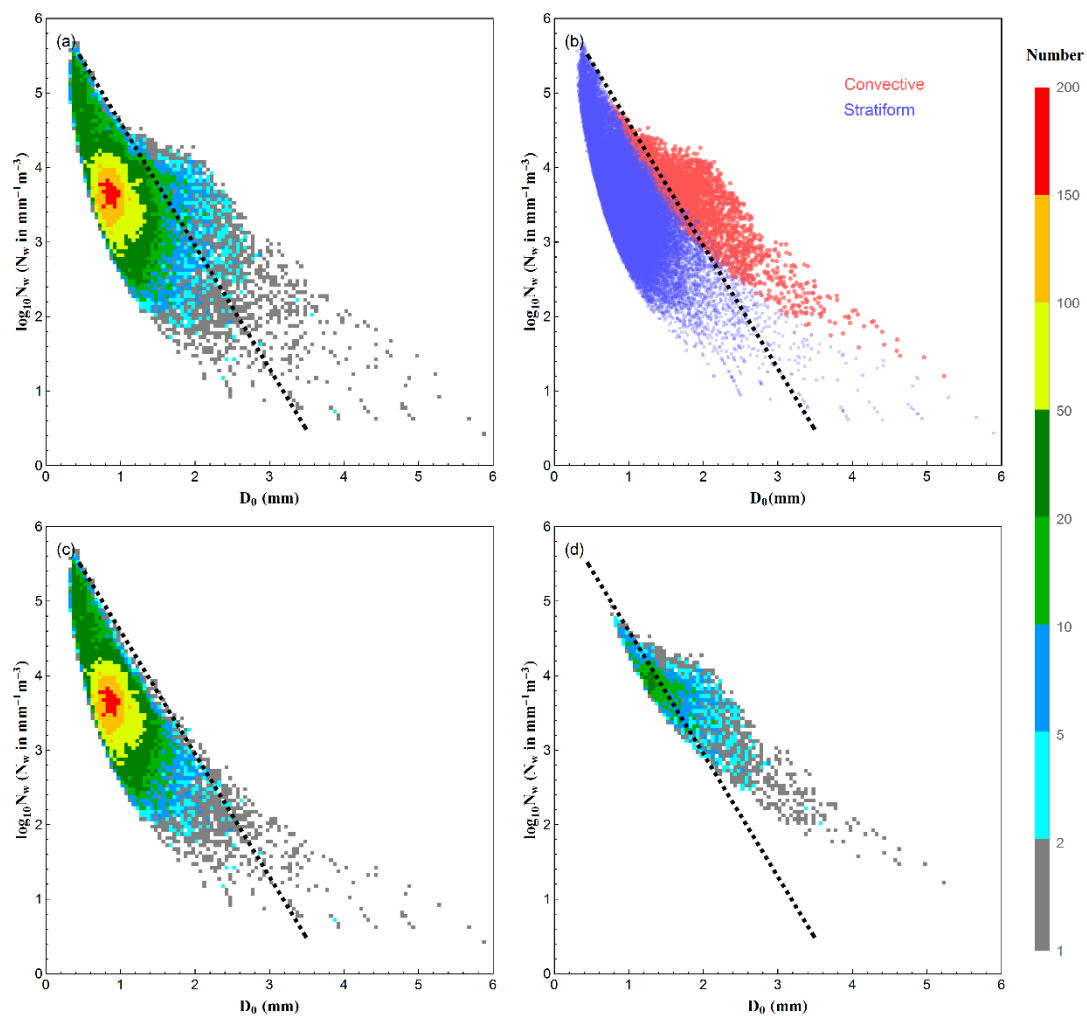

Figure S1: Scatter density plot of  $\log_{10}N_w$  versus  $D_0$ : (a) the total rainfall events; (c) stratiform events; (d) convective events. (b) is the scatterplot of  $\log_{10}N_w$  versus  $D_0$  for convective (red circle dots) and stratiform (blue square dots) cases. The black dashed line is the  $\log_{10}N_w - D_0$  relationship for stratiform rain reported by Thurai et al. (2016).
